# Supplementary material for: Detection of Human cytomegalovirus UL55 Gene and IE/E Protein Expression in Colorectal Cancer Patients in Egypt
Source: BMC Cancer. 2023 Aug 3;23:723. doi: 10.1186/s12885-023-11200-x (PMC10398988; doi:10.1186/s12885-023-11200-x)
Supplement: Supplementary file 1 — Additional file 1: Table S1. Tissues extracted DNA purity, concentration and PCR results. [file 12885_2023_11200_MOESM1_ESM.xlsx]

## Sheet: Sheet1
Table 1 S1 Tissues extracted DNA purity, concentration and PCR results	Histological type	DNA concentration	PURITY	PCR result
1	Tumour tissue	67	1.99	Negative
1	Adjacent non-neoplasti tissue	234	1.95	Negative
2	Tumour tissue	456	1.99	positive
2	Adjacent non-neoplasti tissue	102.3	1.97	positive
3	Tumour tissue	656	1.3	Negative
3	Adjacent non-neoplasti tissue	40.6	1.78	Negative
4	Tumour tissue	45	1.8	Negative
4	Adjacent non-neoplasti tissue	453	1.9	Negative
5	Tumour tissue	67	1.9	Negative
5	Adjacent non-neoplasti tissue	545	1.6	Negative
6	Tumour tissue	3	1.9	positive
6	Adjacent non-neoplasti tissue	345	1.8	Negative
7	Tumour tissue	50	2.42	positive
7	Adjacent non-neoplasti tissue	65.2	1.23	Negative
8	Tumour tissue	67	2	Negative
8	Adjacent non-neoplasti tissue	70.1	1.6	Negative
9	Tumour tissue	68	1.8	positive
9	Adjacent non-neoplasti tissue	545	2	Negative
10	Tumour tissue	86	1.78	positive
10	Adjacent non-neoplasti tissue	239.4	2.5	positive
11	Tumour tissue	23	1.7	Negative
11	Adjacent non-neoplasti tissue	423.7	2.2	Negative
12	Tumour tissue	55	1.87	positive
12	Adjacent non-neoplasti tissue	20.8	1.9	positive
13	Tumour tissue	34	1.88	positive
13	Adjacent non-neoplasti tissue	54.6	1.9	Negative
14	Tumour tissue	77	1.75	Negative
14	Adjacent non-neoplasti tissue	43	1.92	Negative
15	Tumour tissue	142.3	1.87	Negative
15	Adjacent non-neoplasti tissue	128.7	1.99	Negative
16	Tumour tissue	78.4	1.5	positive
16	Adjacent non-neoplasti tissue	560	1.92	Negative
17	Tumour tissue	67	2.19	positive
17	Adjacent non-neoplasti tissue	171.323	1.87	positive
18	Tumour tissue	203	2.3	Negative
18	Adjacent non-neoplasti tissue	101.4	2	Negative
19	Tumour tissue	95.4	2.03	Negative
19	Adjacent non-neoplasti tissue	35	1.9	Negative
20	Tumour tissue	34	2.4	positive
20	Adjacent non-neoplasti tissue	798	1.99	positive
21	Tumour tissue	45	1.94	Negative
21	Adjacent non-neoplasti tissue	678	2.1	Negative
22	Tumour tissue	45	2.33	positive
22	Adjacent non-neoplasti tissue	43.8	1.99	Negative
23	Tumour tissue	98	2.09	Negative
23	Adjacent non-neoplasti tissue	58	1.94	Negative
24	Tumour tissue	96	1.9	positive
24	Adjacent non-neoplasti tissue	35	1.72	Negative
25	Tumour tissue	89	1.7	positive
25	Adjacent non-neoplasti tissue	67	1.79	Negative
26	Tumour tissue	43.2	2.8	Negative
26	Adjacent non-neoplasti tissue	98.7	1.99	Negative
27	Tumour tissue	34	1.91	positive
27	Adjacent non-neoplasti tissue	46	2.12	Negative
28	Tumour tissue	34	2.3	positive
28	Adjacent non-neoplasti tissue	23	1.9	positive
29	Tumour tissue	56	1.97	positive
29	Adjacent non-neoplasti tissue	45	2	Negative
30	Tumour tissue	57	1.7	Negative
30	Adjacent non-neoplasti tissue	222	1.98	Negative
31	Tumour tissue	555	1.76	positive
31	Adjacent non-neoplasti tissue	568	1.89	Negative
32	Tumour tissue	344	1.99	positive
32	Adjacent non-neoplasti tissue	13.7	1.97	positive
33	Tumour tissue	12	2	Negative
33	Adjacent non-neoplasti tissue	50.7	2.04	Negative
34	Tumour tissue	56	1.86	positive
34	Adjacent non-neoplasti tissue	23	1.99	positive
35	Tumour tissue	12	2	positive
35	Adjacent non-neoplasti tissue	690.2	2.04	positive
36	Tumour tissue	333	1.85	positive
36	Adjacent non-neoplasti tissue	56.4	2	Negative
37	Tumour tissue	33	1.94	positive
37	Adjacent non-neoplasti tissue	12.8	1.89	Negative
38	Tumour tissue	60	2.02	positive
38	Adjacent non-neoplasti tissue	186.8	1.92	Negative
39	Tumour tissue	563	2.4	positive
39	Adjacent non-neoplasti tissue	33	2.3	Negative
40	Tumour tissue	201.2	2.2	positive
40	Adjacent non-neoplasti tissue	77.6	1.98	Negative
41	Tumour tissue	43.2	1.96	positive
41	Adjacent non-neoplasti tissue	147.2	1.99	positive
42	Tumour tissue	12	1.76	positive
42	Adjacent non-neoplasti tissue	132.545	2.11	Negative
43	Tumour tissue	132.5	1.98	positive
43	Adjacent non-neoplasti tissue	68.7	1.99	positive
44	Tumour tissue	158.6	1.87	positive
44	Adjacent non-neoplasti tissue	24	2	Negative
45	Tumour tissue	78	1.99	positive
45	Adjacent non-neoplasti tissue	35	1.81	positive
46	Tumour tissue	69.52	2.01	Negative
46	Adjacent non-neoplasti tissue	35	1.98	Negative
47	Tumour tissue	789	1.92	positive
47	Adjacent non-neoplasti tissue	88.3	1.76	Negative
48	Tumour tissue	56	1.9	positive
48	Adjacent non-neoplasti tissue	85.67	1.8	positive
49	Tumour tissue	59.3	1.9	Negative
49	Adjacent non-neoplasti tissue	75.2	1.8	Negative
50	Tumour tissue	440.6	1.9	Negative
50	Adjacent non-neoplasti tissue	102.3	1.8	Negative
